# Supplementary material
Source: Springer Nature journal article supplement (https://www.springermedizin.de/resource/supplementary/12885_2012_3776_MOESM9_ESM.pdf/9464432)

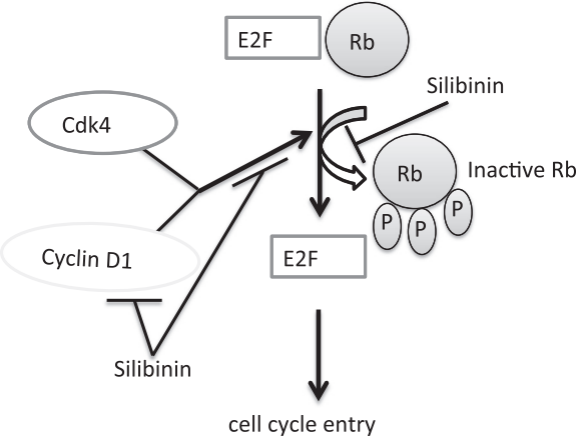

Supplement: MOESM9 [file 9464432]
